# Supplementary material for: Fine-Scale Heterogeneity of a Cold-Water Coral Reef and Its Influence on the Distribution of Associated Taxa
Source: Frontiers journal article supplement (doi:10.3389/fmars.2021.556313), 2021-03-23
Supplement: Table_1.DOCX [file Table_1.DOCX]

|  | Site A | | | | | | Site B | | | | | | Site C | | | | | | | |
| --- | --- | --- | --- | --- | --- | --- | --- | --- | --- | --- | --- | --- | --- | --- | --- | --- | --- | --- | --- | --- |
|  | 0.5 (820 df) | | 1 (219 df) | | 2 (df: 54) | | 0.5 (df: 1047) | | 1 (df: 285) | | 2 (df: 87) | | 0.5(df: 1103) | | 1 (df: 308) | | | 2 (df: 83) | |
|  | X2 | P-values | X2 | P-values | X2 | P-values | X2 | P-values | X2 | P-values | X2 | P-values | X2 | P-values | | X2 | P-values | X2 | P-values |
| *Aphrocallistes* | **1945** | **<0.001** | **823** | **<0.001** | **484** | **<0.001** | **2413** | **<0.001** | **1186** | **<0.001** | **784** | **<0.001** | **1988** | **<0.001** | | **1093** | **<0.001** | **626** | **<0.001** |
| *Anthomastus* | **934** | **0.005** | 235 | 0.45 | **94** | **0.001** | **949** | **0.028** | **232** | **0.0196** | 72 | 0.231 | **1834** | **<0.001** | | **753** | **<0.001** | **123** | **0.006** |
| *Callogorgia* | 888 | 0.099 | **312** | **<0.001** | **80** | **0.025** | **1203** | **0.001** | 331 | 0.065 | **125** | **0.009** |  |  | |  |  |  |  |
| *Psolus* | **953** | **0.002** | **564** | **<0.001** | **81** | **0.02** |  |  |  |  |  |  | **4003** | **<0.001** | | **1645** | **<0.001** | **1031** | **<0.001** |
| *Stichopathes* | **1115** | **<0.001** | **318** | **<0.001** | 64 | 0.319 | **1229** | **<0.001** | **455** | **<0.001** | **183** | **<0.001** |  |  | |  |  |  |  |
| Zoanthidae | 870 | 0.216 | 210 | 0.693 | 68 | 0.1907 | 1118 | 0.126 | 284 | 0.975 | 112 | 0.078 |  |  | |  |  |  |  |
| *Cidaris* | 791 | 0.483 | 226 | 0.7 | 67 | 0.224 | 1010 | 0.424 | 309 | 0.323 | 89 | 0.825 | **966.6** | **<0.002** | | 275.6 | 0.185 | 66 | 0.17 |
| *Gracilechinus green* | 763 | 0.156 | 196 | 0.272 | 43 | 0.266 | 1084 | 0.417 | 295 | 0.665 | 94 | 0.582 | 1092.1 | 0.828 | | **402.5** | **<0.001** | 78 | 0.728 |
| *Galatheiodae* | 796 | 0.208 | 233 | 0.473 | 72 | 0.111 | 1113 | 0.155 | 302 | 0.458 | 87 | 0.946 |  |  | |  |  |  |  |
| *Gracilechinus pink* | 765 | 0.168 | 188 | 0.128 | 65 | 0.288 | 1023 | 0.56 | 327 | 0.086 | 81 | 0.663 |  |  | |  |  |  |  |
| *Madrepora* | **998** | **<0.001** | **269** | **0.025** | **87** | **0.006** | **1432** | **<0.001** | **584** | **<0.001** | **154** | **<0.001** | **1445** | **<0.001** | | **572** | **<0.001** | **186** | **<0.001** |
| *Desmophyllum* | **1139** | **<0.001** | **470** | **<0.001** | **237** | **<0.001** | **1479** | **<0.001** | **599** | **<0.001** | **313** | **<0.001** | **1653** | **<0.001** | | **853** | **<0.001** | **154** | **<0.001** |
| *Alcyonacea* | **951** | **0.002** | 260 | 0.058 | **92** | **0.002** | **1191** | **0.003** | **371** | **<0.001** | **139** | **<0.001** | 1117 | 0.755 | | **361** | **0.04** | **117** | **0.018** |
